# Supplementary material for: Household Transmission of Zoonotic Influenza Viruses in a Cohort of Egyptian Poultry Growers
Source: PubMed Central journal article supplement (PMC4526956; doi:10.2196/resprot.4331), 2015-06-22
Supplement: resprot_v4i2e74_app1.pdf [file resprot_v4i2e74_app1.pdf]

Today's date:        
Day month year

Location ID:

Insert Barcode:

**FORM C 1**

***Household data***

**Address**

**Governorate**

**Village**

**GPS East**

|                      |                      |                      |                      |                      |                      |                      |                      |                      |                      |                      |                      |                      |                      |                      |                      |                      |                      |                      |                      |
|----------------------|----------------------|----------------------|----------------------|----------------------|----------------------|----------------------|----------------------|----------------------|----------------------|----------------------|----------------------|----------------------|----------------------|----------------------|----------------------|----------------------|----------------------|----------------------|----------------------|
| <input type="text"/> | <input type="text"/> | <input type="text"/> | <input type="text"/> | <input type="text"/> | <input type="text"/> | <input type="text"/> | <input type="text"/> | <input type="text"/> | <input type="text"/> | <input type="text"/> | <input type="text"/> | <input type="text"/> | <input type="text"/> | <input type="text"/> | <input type="text"/> | <input type="text"/> | <input type="text"/> | <input type="text"/> | <input type="text"/> |
|----------------------|----------------------|----------------------|----------------------|----------------------|----------------------|----------------------|----------------------|----------------------|----------------------|----------------------|----------------------|----------------------|----------------------|----------------------|----------------------|----------------------|----------------------|----------------------|----------------------|

**GPS North**

|                      |                      |                      |                      |                      |                      |                      |                      |                      |                      |                      |                      |                      |                      |                      |                      |                      |                      |                      |                      |
|----------------------|----------------------|----------------------|----------------------|----------------------|----------------------|----------------------|----------------------|----------------------|----------------------|----------------------|----------------------|----------------------|----------------------|----------------------|----------------------|----------------------|----------------------|----------------------|----------------------|
| <input type="text"/> | <input type="text"/> | <input type="text"/> | <input type="text"/> | <input type="text"/> | <input type="text"/> | <input type="text"/> | <input type="text"/> | <input type="text"/> | <input type="text"/> | <input type="text"/> | <input type="text"/> | <input type="text"/> | <input type="text"/> | <input type="text"/> | <input type="text"/> | <input type="text"/> | <input type="text"/> | <input type="text"/> | <input type="text"/> |
|----------------------|----------------------|----------------------|----------------------|----------------------|----------------------|----------------------|----------------------|----------------------|----------------------|----------------------|----------------------|----------------------|----------------------|----------------------|----------------------|----------------------|----------------------|----------------------|----------------------|

**Phone numbers:**

Mobile

Work

Home

Others

Today's date:

Day

month

year

Location ID:

**1- How many individuals live in your house?**

Family pedigree

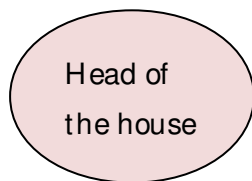

Today's date:

|                      |                      |                      |                      |                      |                      |
|----------------------|----------------------|----------------------|----------------------|----------------------|----------------------|
| <input type="text"/> | <input type="text"/> | <input type="text"/> | <input type="text"/> | <input type="text"/> | <input type="text"/> |
| Day                  |                      | month                |                      | year                 |                      |

Location ID:

male

femal  
e

Today's date:

Day

month

year

Location ID:

## 2-What is your monthly expenditure on food per month?

501-1000

1001-1500

>1500

Unknown

Today's date:

|                      |                      |                      |                      |
|----------------------|----------------------|----------------------|----------------------|
| <input type="text"/> | <input type="text"/> | <input type="text"/> | <input type="text"/> |
| Day                  | month                | year                 |                      |

Location ID:

**3- Identify the animals from the list below that you currently have in your flock:**

- 
- 
- 
- 
- 
- 
- 
- 
- 
- 
- 
- 
- 
- 
- 

|                  | Yes | No | Number of animals |
|------------------|-----|----|-------------------|
| <b>Chickens</b>  |     |    |                   |
| <b>Ducks</b>     |     |    |                   |
| <b>Geese</b>     |     |    |                   |
| <b>Pigeons</b>   |     |    |                   |
| <b>Turkey</b>    |     |    |                   |
| <b>Rabbits</b>   |     |    |                   |
| <b>Cows</b>      |     |    |                   |
| <b>Buffaloes</b> |     |    |                   |
| <b>Sheep</b>     |     |    |                   |
| <b>Donkeys</b>   |     |    |                   |
| <b>Horses</b>    |     |    |                   |
| <b>Goats</b>     |     |    |                   |
| <b>Dogs</b>      |     |    |                   |
| <b>Cats</b>      |     |    |                   |
| <b>Camels</b>    |     |    |                   |

Today's date:

Day

month

year

Location ID:

Today's date:

Day

month

year

Location ID:

**4-Where do you usually keep your poultry?**

- In a barn                                       On the roof
- Inside the house

**5-What do you do if you find dead poultry?**

- Incinerate                                       Bury
- Throw it in the trash                       Throw it in water stream
- Get rid of it in a closed bag in the trash

**6- What do you do if you suspect diseased poultry?**

- Separate it from other animals               Slaughter it
- Seek medical advice                       Get rid of it
- Do nothing

Today's date:

|     |  |       |  |      |  |
|-----|--|-------|--|------|--|
|     |  |       |  |      |  |
| Day |  | month |  | year |  |

Location ID:

***Poultry vaccination***

**7-Do you vaccinate your poultry against avian influenza?**

- Yes
- No

**8- What type of vaccine do you use?**

- H5N1
- H9N2
- Other
- Unknown

**9-Who administers the vaccine?**

- Veterinarian
- Worker
- Family member

**10- When was the last vaccine administered on your flock?**

|      |       |  |
|------|-------|--|
|      |       |  |
| Day  | Month |  |
| Year |       |  |



Today's date:

|                      |                      |                      |                      |
|----------------------|----------------------|----------------------|----------------------|
| <input type="text"/> | <input type="text"/> | <input type="text"/> | <input type="text"/> |
| Day                  | month                | year                 |                      |

Location ID:

**For investigator use only**

Was Form reviewed   yes No

**I certify that the information recorded here is complete and has been accurately recorded:**

**Initials**

**Date**

|                      |                      |                      |
|----------------------|----------------------|----------------------|
| <input type="text"/> | <input type="text"/> | <input type="text"/> |
| Day                  | Month                |                      |

**General comments**
